# Supplementary material for: Spin Canting and Weak Ferromagnetism in a New 2D Coordination Polymer with the Co(II) Chain Bridged by a Single End-to-End Azide
Source: MDPI journal article supplement (doi:10.3390/inorganics11110444), 2023-11-18
Supplement: s1 [file s1]

# Spin Canting and Weak Ferromagnetism in a New 2D Coordination Polymer with the Co(II) Chain Bridged by a Single End-to-End Azide

Yi-Lin Kuo <sup>1</sup>, Hsin-Kuan Liu <sup>2</sup> and Chen-I Yang <sup>1,\*</sup>

<sup>1</sup> Department of Chemistry, Tunghai University, Taichung 407, Taiwan; rj810905@gmail.com

<sup>2</sup> Instrumentation Center, National Cheng Kung University, Tainan 710, Taiwan; z10906009@ncku.edu.tw

\* Correspondence: ciyang@thu.edu.tw; Tel.: +886-4-2359-0121 (ext. 32237)

|                   | Index                                                                                                     | Page |
|-------------------|-----------------------------------------------------------------------------------------------------------|------|
| <b>Figure S1.</b> | Simulated PXRD pattern (red) and experimental PXRD pattern (black, Cu-K $\alpha$ ) of compound <b>1</b> . | 2    |
| <b>Figure S2.</b> | Thermogravimetric (TG) analysis diagram of compound <b>1</b> .                                            | 3    |

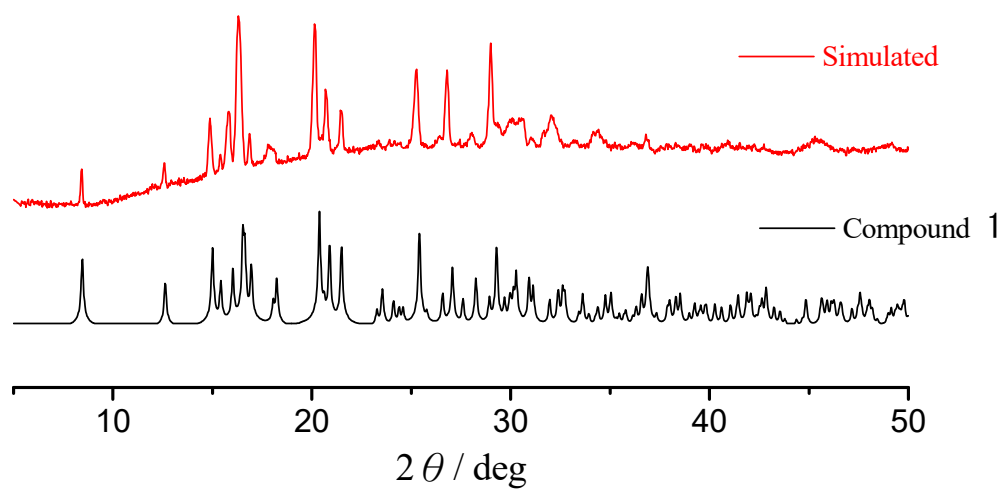

**Figure. S1.** Simulated PXRD pattern (red) and experimental PXRD pattern (black, Cu- $K_{\alpha}$ ) of compound 1.

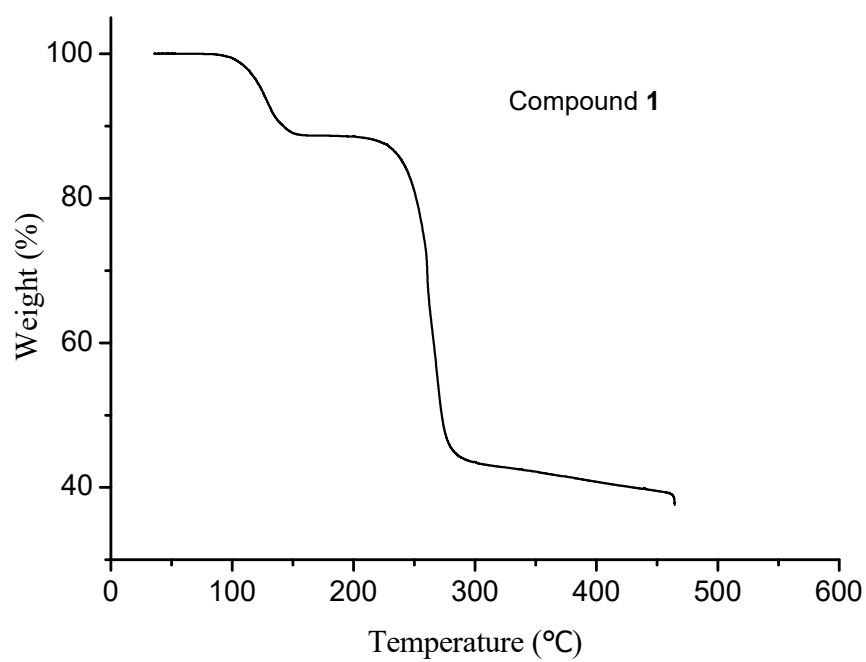

**Figure S2.** Thermogravimetric (TG) analysis diagram of compound **1**.
